# Supplementary material
Source: ML conference proceedings conference paper supplement (https://proceedings.neurips.cc/paper_files/paper/2022/hash/0073cc73e1873b35345209b50a3dab66-Abstract.html)
Supplement: Supplementary file 1 [file 0073cc73e1873b35345209b50a3dab66-Supplemental-Conference.zip]

Archive with 80 entries (63 files):
- NN-Explainer-main/
- NN-Explainer-main/.gitignore
- NN-Explainer-main/README.md
- NN-Explainer-main/datasets/
- NN-Explainer-main/datasets/COCO2014/
- NN-Explainer-main/datasets/COCO2014/README.md
- NN-Explainer-main/datasets/COCO2014/download_coco2014.sh
- NN-Explainer-main/datasets/VOC2007/
- NN-Explainer-main/datasets/VOC2007/README.md
- NN-Explainer-main/environment.yml
- NN-Explainer-main/examples/
- NN-Explainer-main/examples/Intro Teaser.png
- NN-Explainer-main/examples/Segmentation Comparisons.png
- NN-Explainer-main/notebooks/
- NN-Explainer-main/notebooks/compute_score.ipynb
- NN-Explainer-main/notebooks/error_measures-imports.ipynb
- NN-Explainer-main/notebooks/error_measures.ipynb
- NN-Explainer-main/notebooks/evaluate_class_scores.ipynb
- NN-Explainer-main/notebooks/image-plot.ipynb
- NN-Explainer-main/notebooks/image-plots-classes.ipynb
- NN-Explainer-main/notebooks/image_plot_topk.ipynb
- NN-Explainer-main/notebooks/produce_tables.ipynb
- NN-Explainer-main/src/
- NN-Explainer-main/src/config_files/
- NN-Explainer-main/src/config_files/classifier_training/
- NN-Explainer-main/src/config_files/classifier_training/classifier_resnet50_coco_training.cfg
- NN-Explainer-main/src/config_files/classifier_training/classifier_resnet50_voc_training.cfg
- NN-Explainer-main/src/config_files/classifier_training/classifier_vgg16_coco_training.cfg
- NN-Explainer-main/src/config_files/classifier_training/classifier_vgg16_voc_training.cfg
- NN-Explainer-main/src/config_files/explainer_training/
- NN-Explainer-main/src/config_files/explainer_training/explainer_resnet50_coco_training.cfg
- NN-Explainer-main/src/config_files/explainer_training/explainer_resnet50_voc_training.cfg
- NN-Explainer-main/src/config_files/explainer_training/explainer_vgg16_coco_training.cfg
- NN-Explainer-main/src/config_files/explainer_training/explainer_vgg16_voc_training.cfg
- NN-Explainer-main/src/config_files/testing_and_mask_saving/
- NN-Explainer-main/src/config_files/testing_and_mask_saving/explainer_resnet50_coco_test_and_save_masks.cfg
- NN-Explainer-main/src/config_files/testing_and_mask_saving/explainer_resnet50_voc_test_and_save_masks.cfg
- NN-Explainer-main/src/config_files/testing_and_mask_saving/explainer_vgg16_coco_test_and_save_masks.cfg
- NN-Explainer-main/src/config_files/testing_and_mask_saving/explainer_vgg16_voc_test_and_save_masks.cfg
- NN-Explainer-main/src/data/
- NN-Explainer-main/src/data/dataloader.py
- NN-Explainer-main/src/data/dataset.py
- NN-Explainer-main/src/evaluation/
- NN-Explainer-main/src/evaluation/IGOS_pp/
- NN-Explainer-main/src/evaluation/IGOS_pp/LICENSE
- NN-Explainer-main/src/evaluation/IGOS_pp/args.py
- NN-Explainer-main/src/evaluation/IGOS_pp/igos_utils.py
- NN-Explainer-main/src/evaluation/IGOS_pp/main.py
- NN-Explainer-main/src/evaluation/IGOS_pp/methods.py
- NN-Explainer-main/src/evaluation/IGOS_pp/methods_helper.py
- NN-Explainer-main/src/evaluation/eval_utils/
- NN-Explainer-main/src/evaluation/eval_utils/assessment_metrics.py
- NN-Explainer-main/src/evaluation/eval_utils/compute_masks.py
- NN-Explainer-main/src/evaluation/eval_utils/compute_scores.py
- NN-Explainer-main/src/evaluation/evaluate.py
- NN-Explainer-main/src/evaluation/evaluate_segmentations.py
- NN-Explainer-main/src/evaluation/explainer.py
- NN-Explainer-main/src/evaluation/extremal_perturbations.py
- NN-Explainer-main/src/evaluation/generate_coco_segmentations.py
- NN-Explainer-main/src/evaluation/grad_cam.py
- NN-Explainer-main/src/evaluation/guided_backprop.py
- NN-Explainer-main/src/evaluation/print_mean_scores.py
- NN-Explainer-main/src/evaluation/rise.py
- NN-Explainer-main/src/evaluation/rt_saliency.py
- NN-Explainer-main/src/main.py
- NN-Explainer-main/src/models/
- NN-Explainer-main/src/models/classifier.py
- NN-Explainer-main/src/models/explainer.py
- NN-Explainer-main/src/models/explainer_classifier.py
- NN-Explainer-main/src/models/explainer_classifier_rtsal.py
- NN-Explainer-main/src/models/interpretable_fcnn.py
- NN-Explainer-main/src/utils/
- NN-Explainer-main/src/utils/argparser.py
- NN-Explainer-main/src/utils/helper.py
- NN-Explainer-main/src/utils/image_utils.py
- NN-Explainer-main/src/utils/loss.py
- NN-Explainer-main/src/utils/metrics.py
- NN-Explainer-main/src/utils/rtsal_helper.py
- NN-Explainer-main/src/utils/rtsal_loss.py
- NeurIPS_2022___WYSWYC_12-end.pdf
