# Supplementary material
Source: ML conference proceedings conference paper supplement (https://proceedings.neurips.cc/paper_files/paper/2022/hash/0073cc73e1873b35345209b50a3dab66-Abstract.html)
Supplement: Supplementary file 1 [file 0073cc73e1873b35345209b50a3dab66-Supplemental-Conference.zip › NN-Explainer-main/datasets/COCO2014/README.md]

# How to use the COCO dataset

Execute the script `download_coco2014.sh` to download the COCO2014 dataset. This will take quite some time to execute since the dataset is relatively large. Note that we have used the val2014 dataset as a testing dataset and therefore needed to do a custom train/val split on the train2014 dataset to do validation after each training epoch. The corresponding annotations for the split will be downloaded to the `annotations` directory and loaded automatically in the code. 
