# Supplementary material
Source: ML conference proceedings conference paper supplement (https://proceedings.neurips.cc/paper_files/paper/2022/hash/0073cc73e1873b35345209b50a3dab66-Abstract.html)
Supplement: Supplementary file 1 [file 0073cc73e1873b35345209b50a3dab66-Supplemental-Conference.zip › NN-Explainer-main/environment.yml]

name: pytorch_gpu
channels:
  - pytorch
  - conda-forge
  - defaults
dependencies:
  - _libgcc_mutex=0.1=conda_forge
  - _openmp_mutex=4.5=1_llvm
  - absl-py=0.11.0=py38h578d9bd_0
  - aiohttp=3.7.3=py38h497a2fe_0
  - args=0.1.0=py38h32f6830_1003
  - asttokens=2.0.5=pyhd8ed1ab_0
  - async-timeout=3.0.1=py_1000
  - attrs=20.3.0=pyhd3deb0d_0
  - backcall=0.2.0=pyh9f0ad1d_0
  - backports=1.0=py_2
  - backports.functools_lru_cache=1.6.4=pyhd8ed1ab_0
  - blas=1.0=mkl
  - blinker=1.4=py_1
  - bottleneck=1.3.4=py38hce1f21e_0
  - brotlipy=0.7.0=py38h8df0ef7_1001
  - bzip2=1.0.8=h7b6447c_0
  - c-ares=1.17.1=h36c2ea0_0
  - ca-certificates=2022.3.29=h06a4308_1
  - cachetools=4.1.1=py_0
  - certifi=2021.10.8=py38h06a4308_2
  - cffi=1.14.4=py38ha65f79e_1
  - chardet=3.0.4=py38h924ce5b_1008
  - click=7.1.2=pyh9f0ad1d_0
  - clint=0.5.1=py_1
  - cryptography=3.3.1=py38h2b97feb_0
  - cudatoolkit=11.3.1=h2bc3f7f_2
  - cython=0.29.23=py38h709712a_1
  - debugpy=1.5.1=py38h295c915_0
  - decorator=5.1.1=pyhd8ed1ab_0
  - entrypoints=0.4=pyhd8ed1ab_0
  - executing=0.8.3=pyhd8ed1ab_0
  - ffmpeg=4.3=hf484d3e_0
  - freetype=2.10.4=h7ca028e_0
  - fsspec=0.8.5=pyhd8ed1ab_0
  - future=0.18.2=py38h578d9bd_2
  - gmp=6.2.1=h2531618_2
  - gnutls=3.6.15=he1e5248_0
  - google-auth=1.24.0=pyhd3deb0d_0
  - google-auth-oauthlib=0.4.1=py_2
  - grpcio=1.34.0=py38hdd6454d_0
  - idna=2.10=pyh9f0ad1d_0
  - importlib-metadata=3.3.0=py38h578d9bd_2
  - ipykernel=6.10.0=py38h7f3c49e_0
  - ipython=8.2.0=py38h578d9bd_0
  - jedi=0.18.1=py38h578d9bd_0
  - jpeg=9b=h024ee3a_2
  - jupyter_client=7.1.2=pyhd8ed1ab_0
  - jupyter_core=4.9.2=py38h578d9bd_0
  - lame=3.100=h7b6447c_0
  - lcms2=2.11=h396b838_0
  - ld_impl_linux-64=2.35.1=hea4e1c9_1
  - libffi=3.3=h58526e2_2
  - libgcc-ng=9.3.0=h5dbcf3e_17
  - libiconv=1.15=h63c8f33_5
  - libidn2=2.3.1=h27cfd23_0
  - libpng=1.6.37=h21135ba_2
  - libprotobuf=3.14.0=h780b84a_0
  - libsodium=1.0.18=h36c2ea0_1
  - libstdcxx-ng=9.3.0=h2ae2ef3_17
  - libtasn1=4.16.0=h27cfd23_0
  - libtiff=4.1.0=h2733197_1
  - libunistring=0.9.10=h27cfd23_0
  - libuv=1.40.0=h7f98852_0
  - llvm-openmp=11.0.0=hfc4b9b4_1
  - lz4-c=1.9.2=he1b5a44_3
  - markdown=3.3.3=pyh9f0ad1d_0
  - matplotlib-inline=0.1.3=pyhd8ed1ab_0
  - mkl=2020.4=h726a3e6_304
  - mkl-service=2.3.0=py38h1e0a361_2
  - mkl_fft=1.2.0=py38hab2c0dc_1
  - mkl_random=1.2.0=py38hc5bc63f_1
  - multidict=5.1.0=py38h497a2fe_0
  - ncurses=6.2=h58526e2_4
  - nest-asyncio=1.5.4=pyhd8ed1ab_0
  - nettle=3.7.2=hbbd107a_1
  - ninja=1.10.2=h4bd325d_0
  - numexpr=2.7.3=py38hb2eb853_0
  - numpy=1.19.2=py38h54aff64_0
  - numpy-base=1.19.2=py38hfa32c7d_0
  - oauthlib=3.0.1=py_0
  - olefile=0.46=pyh9f0ad1d_1
  - openh264=2.1.0=hd408876_0
  - openssl=1.1.1n=h7f8727e_0
  - packaging=20.8=pyhd3deb0d_0
  - parso=0.8.3=pyhd8ed1ab_0
  - pexpect=4.8.0=pyh9f0ad1d_2
  - pickleshare=0.7.5=py_1003
  - pillow=8.0.1=py38he98fc37_0
  - pip=20.3.3=pyhd8ed1ab_0
  - prompt-toolkit=3.0.27=pyha770c72_0
  - protobuf=3.14.0=py38h709712a_0
  - psutil=5.8.0=py38h27cfd23_1
  - ptyprocess=0.7.0=pyhd3deb0d_0
  - pure_eval=0.2.2=pyhd8ed1ab_0
  - pyasn1=0.4.8=py_0
  - pyasn1-modules=0.2.7=py_0
  - pycparser=2.20=pyh9f0ad1d_2
  - pygments=2.11.2=pyhd8ed1ab_0
  - pyjwt=1.7.1=py_0
  - pyopenssl=20.0.1=pyhd8ed1ab_0
  - pyparsing=2.4.7=pyh9f0ad1d_0
  - pysocks=1.7.1=py38h924ce5b_2
  - python=3.8.6=hffdb5ce_2_cpython
  - python_abi=3.8=1_cp38
  - pytorch=1.10.2=py3.8_cuda11.3_cudnn8.2.0_0
  - pytorch-lightning=1.1.2=pyhd8ed1ab_0
  - pytorch-mutex=1.0=cuda
  - pyyaml=5.3.1=py38h8df0ef7_1
  - pyzmq=19.0.2=py38ha71036d_2
  - readline=8.0=he28a2e2_2
  - requests=2.25.1=pyhd3deb0d_0
  - requests-oauthlib=1.3.0=pyh9f0ad1d_0
  - rsa=4.6=pyh9f0ad1d_0
  - setuptools=49.6.0=py38h924ce5b_2
  - six=1.15.0=pyh9f0ad1d_0
  - sqlite=3.34.0=h74cdb3f_0
  - stack_data=0.2.0=pyhd8ed1ab_0
  - tensorboard=2.8.0=pyhd8ed1ab_1
  - tensorboard-data-server=0.6.0=py38hca6d32c_0
  - tensorboard-plugin-wit=1.7.0=pyh9f0ad1d_0
  - tk=8.6.10=h21135ba_1
  - torchaudio=0.10.2=py38_cu113
  - torchvision=0.11.3=py38_cu113
  - tornado=6.1=py38h497a2fe_1
  - tqdm=4.54.1=pyhd8ed1ab_1
  - traitlets=5.1.1=pyhd8ed1ab_0
  - typing-extensions=3.7.4.3=0
  - typing_extensions=3.7.4.3=py_0
  - urllib3=1.26.2=pyhd8ed1ab_0
  - wcwidth=0.2.5=pyh9f0ad1d_2
  - werkzeug=1.0.1=pyh9f0ad1d_0
  - wheel=0.36.2=pyhd3deb0d_0
  - xz=5.2.5=h516909a_1
  - yaml=0.2.5=h516909a_0
  - yarl=1.6.3=py38h497a2fe_0
  - zeromq=4.3.4=h9c3ff4c_0
  - zipp=3.4.0=py_0
  - zlib=1.2.11=h516909a_1010
  - zstd=1.4.5=h6597ccf_2
  - pip:
    - argon2-cffi==21.3.0
    - argon2-cffi-bindings==21.2.0
    - argparse==1.4.0
    - beautifulsoup4==4.10.0
    - bleach==4.1.0
    - configargparse==1.5.3
    - cycler==0.10.0
    - cython==0.29.23
    - dataclasses==0.6
    - defusedxml==0.7.1
    - funcy==1.16
    - grad-cam==1.3.1
    - imageio==2.9.0
    - importlib-resources==5.2.2
    - ipython-genutils==0.2.0
    - ipywidgets==7.7.0
    - jinja2==3.1.1
    - joblib==1.0.1
    - jsonschema==4.4.0
    - jupyterlab-pygments==0.1.2
    - jupyterlab-widgets==1.1.0
    - kiwisolver==1.3.1
    - markupsafe==2.1.1
    - matplotlib==3.4.1
    - mistune==0.8.4
    - nbclient==0.5.13
    - nbconvert==6.4.5
    - nbformat==5.2.0
    - notebook==6.4.10
    - opencv-python==4.5.3.56
    - pandas==1.1.5
    - pandocfilters==1.5.0
    - prometheus-client==0.13.1
    - pycocotools==2.0.0
    - pymongo==3.12.0
    - pyrsistent==0.18.1
    - python-dateutil==2.8.1
    - pytz==2020.4
    - scikit-learn==0.24.2
    - scipy==1.6.3
    - seaborn==0.11.2
    - send2trash==1.8.0
    - sklearn==0.0
    - soupsieve==2.3.1
    - terminado==0.13.3
    - test-tube==0.7.5
    - testpath==0.6.0
    - threadpoolctl==2.2.0
    - torch-tb-profiler==0.4.0
    - torchmetrics==0.3.2
    - torchray==1.0.0.2
    - ttach==0.0.3
    - webencodings==0.5.1
    - widgetsnbextension==3.6.0
prefix: /home/steven/miniconda3/envs/pytorch_gpu
