# Supplementary material
Source: ML conference proceedings conference paper supplement (https://proceedings.neurips.cc/paper_files/paper/2022/hash/0073cc73e1873b35345209b50a3dab66-Abstract.html)
Supplement: Supplementary file 1 [file 0073cc73e1873b35345209b50a3dab66-Supplemental-Conference.zip › NN-Explainer-main/notebooks/error_measures-imports.ipynb]

# %% [code]
import numpy as np
import os, sys 
    
sys.path.append("../src")

from evaluation.eval_utils.assessment_metrics import prob_sparsity, prob_entropy, saliency, continuous_IOU, discrete_IOU


# %% [code]
# Create data
nx = 100
nc = 10
c = 0
mask1 = np.random.rand(nx,nx)
seg1 = (np.random.rand(nx,nx)>0.5)*1

mask2 = np.ones([nx,nx])
mask3 = np.zeros([nx,nx])
mask4 = seg1.copy()

pvec1 = np.random.rand(nc)
pvec1 = pvec1 / np.sum(pvec1)

pvec2 = np.zeros(nc)
pvec2[c] = 1

pvec3 = np.ones(nc)/nc


# %% [code]
def prob_sparsity(pvec):
     """Sparsity measure.
    
     For pvec of the masked image, we want this to be low.
     For pvec of the inverse masked image, we want this to be high.
     """
     return np.sum(pvec**2)

def prob_entropy(pvec):
     """Sparsity measure.
    
     For pvec of the masked image, we want this to be low.
     For pvec of the inverse masked image, we want this to be high.
     """
     return -np.sum(pvec * np.log(np.maximum(pvec, 1e-15)))


def saliency(pvec, c, mask):
     """
     Continuous saliency measure. 
    
     Adaptation from "Real Time Image Saliency for Black Box Classifiers
 Piotr", Dabkowski and Gal.

     For pvec of the masked image, the lower the better for the masked image.
    
     This measure does not make sense for the inverse masked image.
     """
     a = np.maximum(np.mean(mask), 0.05)
     pclass = pvec[c]
     return np.log(a) - np.log(pclass)

def continuous_IOU(mask, seg):
     ### this is no longer the IoU but 1 + the Soergel distance (which is 1- this ratio below)
     #intersection = np.sum(mask * seg)
     #union = np.sum(mask + seg)/2
     #union = np.sum(mask + seg) - intersection
     intersection = np.sum(np.minimum(mask, seg))
     union = np.sum(np.maximum(mask, seg))
     IOU = intersection/(union + 1e-15)
     return IOU
    
def discrete_IOU(mask, seg, thresh=0.5):
     mask = mask>thresh
     seg = seg>thresh
     intersection = np.sum(np.logical_and(mask, seg)*1.)
     union = np.sum(np.logical_or(mask, seg)*1.)
     IOU = intersection/(union + 1e-15)
     return IOU
    
    

# %% [code]
prob_sparsity(pvec1), prob_sparsity(pvec2), prob_sparsity(pvec3)

# %% [code]
prob_entropy(pvec1), prob_entropy(pvec2), prob_entropy(pvec3)

# %% [code]
saliency(pvec1, c, mask1), saliency(pvec2, c, mask1), saliency(pvec3, c, mask1)

# %% [code]
continuous_IOU(mask1, seg1), continuous_IOU(mask4, seg1), continuous_IOU(mask2, seg1), continuous_IOU(mask3, seg1), 

# %% [code]
discrete_IOU(mask1, seg1), discrete_IOU(mask4, seg1), discrete_IOU(mask2, seg1), discrete_IOU(mask3, seg1), 


# %% [code]
