# Supplementary material
Source: ML conference proceedings conference paper supplement (https://proceedings.neurips.cc/paper_files/paper/2022/hash/0073cc73e1873b35345209b50a3dab66-Abstract.html)
Supplement: Supplementary file 1 [file 0073cc73e1873b35345209b50a3dab66-Supplemental-Conference.zip › NN-Explainer-main/src/config_files/classifier_training/classifier_vgg16_voc_training.cfg]

classifier_type = vgg16
data_base_path = ../datasets/
dataset = VOC
metrics_threshold = 0.0
model_to_train = classifier
