# Supplementary material
Source: ML conference proceedings conference paper supplement (https://proceedings.neurips.cc/paper_files/paper/2022/hash/0073cc73e1873b35345209b50a3dab66-Abstract.html)
Supplement: Supplementary file 1 [file 0073cc73e1873b35345209b50a3dab66-Supplemental-Conference.zip › NN-Explainer-main/src/config_files/explainer_training/explainer_resnet50_voc_training.cfg]

classifier_type = resnet50
data_base_path = ../datasets/
dataset = VOC
entropy_regularizer = 3.0
learning_rate = 1e-04
classifier_checkpoint = <path to a .ckpt file containing a pretrained resnet50 classifier on VOC>
mask_area_constraint_regularizer = 0.8
mask_total_area_regularizer = 0.01
model_to_train = explainer
