# Supplementary material
Source: ML conference proceedings conference paper supplement (https://proceedings.neurips.cc/paper_files/paper/2022/hash/0073cc73e1873b35345209b50a3dab66-Abstract.html)
Supplement: Supplementary file 1 [file 0073cc73e1873b35345209b50a3dab66-Supplemental-Conference.zip › NN-Explainer-main/src/config_files/testing_and_mask_saving/explainer_resnet50_coco_test_and_save_masks.cfg]

classifier_type = resnet50
data_base_path = ../datasets/
dataset = COCO
explainer_classifier_checkpoint = <path to .ckpt file containing an explainer trained on COCO and with a resnet50 classifier>
model_to_train = explainer
save_masks = True
save_masked_images = True
save_path = ./results/
test_batch_size = 1
train_model = False
