# Supplementary material
Source: ML conference proceedings conference paper supplement (https://proceedings.neurips.cc/paper_files/paper/2022/hash/0073cc73e1873b35345209b50a3dab66-Abstract.html)
Supplement: Supplementary file 1 [file 0073cc73e1873b35345209b50a3dab66-Supplemental-Conference.zip › NN-Explainer-main/src/evaluation/eval_utils/compute_scores.py]

import os

import numpy as np
from pathlib import Path

from evaluation.eval_utils.assessment_metrics import saliency, continuous_IOU, discrete_IOU, IOUs, discrete_f1, soft_accuracy, soft_f1
from evaluation.eval_utils.assessment_metrics import mask_coverage, background_coverage, overlap, sim_ratio, f1s, auc
from data.dataloader import VOCDataModule, COCODataModule
from models.classifier import VGG16ClassifierModel, Resnet50ClassifierModel
from utils.helper import get_target_dictionary

from torchray.utils import get_device
import torch

from PIL import Image
import torchvision.transforms as transforms

from tqdm import tqdm

def get_model_and_data(data_path, dataset_name, model_name, model_path):
    if dataset_name == "VOC":
        data_module = VOCDataModule(data_path, test_batch_size=1)
        if model_name == "vgg16":
            model = VGG16ClassifierModel.load_from_checkpoint(model_path, num_classes=20, dataset=dataset_name)
        elif model_name == "resnet50":
            model = Resnet50ClassifierModel.load_from_checkpoint(model_path, num_classes=20, dataset=dataset_name)
    elif dataset_name == "COCO":
        data_module = COCODataModule(data_path, test_batch_size=1)
        if model_name == "vgg16":
            model = VGG16ClassifierModel.load_from_checkpoint(model_path, num_classes=91, dataset=dataset_name)
        elif model_name == "resnet50":
            model = Resnet50ClassifierModel.load_from_checkpoint(model_path, num_classes=91, dataset=dataset_name)

    data_module.setup(stage="test")

    return model, data_module

def segmented_generator(data_module, segmentations_path):
    """Generator that return all the segmented images"""
    for s in tqdm(data_module.test_dataloader()):
        img, meta = s
        x = img
        assert(len(x)==1)
        try:
            category_id = meta[0]["targets"]
            filename = Path(meta[0]["filename"][:-4]+".png")
        except:
            filename = Path(meta[0]['annotation']["filename"][:-4]+".png")
            target_dict = get_target_dictionary(include_background_class=False)
            objects = meta[0]['annotation']['object']
            category_id = [target_dict[e["name"]] for e in objects]
        segmentation_filename =  segmentations_path / filename
        if not os.path.exists(segmentation_filename):
            continue
        else:
            yield x, category_id, filename   

def open_segmentation_mask(segmentation_filename, dataset_name):
    transformer = transforms.Compose([transforms.Resize((224, 224))])
    mask = Image.open(segmentation_filename).convert('L')
    mask = transformer(mask)
    mask = np.array(mask) / 255.0
    if dataset_name == "VOC":
        mask[mask > 0] = 1
    return mask

def get_path_mask(masks_path, dataset_name, model_name, method):
    return masks_path / Path('{}_{}_{}/'.format(dataset_name, model_name, method))

def gen_evaluation(data_path, masks_path, segmentations_path, dataset_name, model_name, model_path, method, compute_p=True):
    # Load the model and data
    model, data_module = get_model_and_data(data_path, dataset_name, model_name, model_path)
    # Path of the masks
    if method in ["0.5", "0", "1", "perfect"]:
        masks_path_method = None
    else:
        masks_path_method = get_path_mask(masks_path, dataset_name, model_name, method)
    
    if compute_p:
        device = get_device()
        model = model.to(device)

    for x, category_id, filename in segmented_generator(data_module, segmentations_path):
        seg_mask = open_segmentation_mask(segmentations_path / filename, dataset_name)
        if method in ["0.5", "0", "1", "perfect"]:
            if method=="0":
                mask = np.zeros(seg_mask.shape, dtype=np.float32)
            elif method=="0.5":
                mask = 0.5*np.ones(seg_mask.shape, dtype=np.float32)
            elif method=="1":
                mask = np.ones(seg_mask.shape, dtype=np.float32)
            elif method=="perfect":
                mask = seg_mask.copy().astype(np.float32)
            else:
                raise ValueError("Something went wrong!")

        else:
            try:
                npz_name = Path(str(filename)[:-4] + ".npz")
                mask = np.load(masks_path_method / npz_name, dataset_name)["arr_0"]
            except:
                continue
        if np.sum(np.isnan(mask)):
            mask = np.zeros(shape=mask.shape, dtype=np.float32)
        if compute_p:
            x = x.to(device)
            logits = model.forward(x)
            p = torch.nn.functional.softmax(logits, dim=1).detach().cpu().numpy().squeeze()
            x_masked = torch.tensor(np.reshape(mask, [1,1, *mask.shape])).to(device) * x
            logits_mask = model.forward(x_masked)
            p_mask = torch.nn.functional.softmax(logits_mask, dim=1).detach().cpu().numpy().squeeze()
            x_background = torch.tensor(np.reshape(1-mask, [1,1, *mask.shape])).to(device) * x
            logits_background = model.forward(x_background)
            p_background = torch.nn.functional.softmax(logits_background, dim=1).detach().cpu().numpy().squeeze()
        else:
            p = None
            p_mask = None
            p_background = None
        yield mask, seg_mask, p, p_mask, p_background, category_id, x.detach().cpu().numpy().squeeze()
    
        
def compute_numbers(data_path, masks_path, segmentations_path, dataset_name, model_name, model_path, method, compute_p=True):
#     sparsity = []
#     sparsity_masked = []
#     sparsity_background = []

#     entropy = []
#     entropy_masked = []
#     entropy_background = []

    d_f1_25 = []
    d_f1_50 = []
    d_f1_75 = []
    c_f1 = []
    a_f1s = []
    acc = []
    aucs = [] 

    d_IOUs = []
    c_IOU = []

    sal = []
    over = []
    background_c = []
    mask_c = []
    sr = []


    for mask, seg_mask, p, p_mask, p_background, category_id, x in gen_evaluation(data_path, masks_path, 
                                                                                  segmentations_path, dataset_name, 
                                                                                  model_name, model_path, 
                                                                                  method, compute_p=compute_p):

#         sparsity.append(prob_sparsity(p))
#         sparsity_masked.append(prob_sparsity(p_mask))
#         sparsity_background.append(prob_sparsity(p_background))

#         entropy.append(prob_entropy(p))
#         entropy_masked.append(prob_entropy(p_mask))
#         entropy_background.append(prob_entropy(p_background))
        d_f1_25.append(discrete_f1(mask, seg_mask, 0.25))
        d_f1_50.append(discrete_f1(mask, seg_mask, 0.50))
        d_f1_75.append(discrete_f1(mask, seg_mask, 0.75))
        c_f1.append(soft_f1(mask, seg_mask))
        a_f1s.append(f1s(mask, seg_mask))
        acc.append(soft_accuracy(mask, seg_mask))
        aucs.append(auc(mask, seg_mask))

        d_IOUs.append(IOUs(mask, seg_mask))
        c_IOU.append(continuous_IOU(mask, seg_mask))

        sal.append(saliency(p_mask, category_id, mask))

        over.append(overlap(mask, seg_mask))
        background_c.append(background_coverage(mask, seg_mask))
        mask_c.append(mask_coverage(mask, seg_mask))

        sr.append(sim_ratio(mask, seg_mask))
        
    return d_f1_25,d_f1_50,d_f1_75,c_f1,a_f1s, acc, aucs, d_IOUs, c_IOU, sal, over, background_c, mask_c, sr
