# Supplementary material
Source: ML conference proceedings conference paper supplement (https://proceedings.neurips.cc/paper_files/paper/2022/hash/0073cc73e1873b35345209b50a3dab66-Abstract.html)
Supplement: Supplementary file 1 [file 0073cc73e1873b35345209b50a3dab66-Supplemental-Conference.zip › NN-Explainer-main/src/evaluation/print_mean_scores.py]

import numpy as np
from statistics import mean

with np.load("results.npz", allow_pickle=True) as file:
	results = file["results"].item()
	for dataset in results:
		print("\n" + dataset + "\n")
		for classifier in results[dataset]:
			print("\t" + classifier + "\n")
			for method in results[dataset][classifier]:
				print("\t\t" + method + "\n")
				for metric in results[dataset][classifier][method]:
					values = results[dataset][classifier][method][metric]
					try:
						print("\t\t\t{}: {}\n".format(metric, mean(values)))
					except:
						values = [mean(value) for value in values]
						print("\t\t\t{}: {}\n".format(metric, mean(values)))


		
