# Supplementary material
Source: ML conference proceedings conference paper supplement (https://proceedings.neurips.cc/paper_files/paper/2022/hash/0073cc73e1873b35345209b50a3dab66-Abstract.html)
Supplement: Supplementary file 1 [file 0073cc73e1873b35345209b50a3dab66-Supplemental-Conference.zip › NN-Explainer-main/src/models/explainer.py]

import pytorch_lightning as pl

from torchvision import models

class Deeplabv3Resnet50ExplainerModel(pl.LightningModule):
    def __init__(self, num_classes=20):
        super().__init__()
        self.explainer = models.segmentation.deeplabv3_resnet50(pretrained=False, num_classes=num_classes)

    def forward(self, x):
        x = self.explainer(x)['out']
        return x
